# Supplementary material for: Large-scale synthesis of organometallic polymer flowers with ultrathin petals for hydrogen peroxide sensing
Source: Royal Society of Chemistry journal article supplement (doi:10.1039/c5py00382b), 2015-01-01
Supplement: c5py00382b1.pdf [file c5py00382b1.pdf]

Supporting Information

# Large-scale synthesis of organometallic polymer flowers with ultrathin petals for hydrogen peroxide sensing

Guodong Liang,\* Xiaodong Li, Suping Bao, Haiyang Gao, Fangming Zhu and Qing Wu

## Materials

Polyethylene terminated with  $[\text{Fe(II)(CN)}_5(4\text{-(dimethylamino)-pyridine})]$  (PE-Fe) were synthesized previously in our lab.<sup>1</sup> Polyethylene (PEO,  $M_n=400$  g/mol, 1000 g/mol, 2000 g/mol, 4000 g/mol, 8000 g/mol, 10000 g/mol, 20000 g/mol, respectively), poly(propylene oxide) (PPO,  $M_n=1000$  g/mol), poly(ethylene oxide)-*b*-poly(propylene oxide)-*b*-poly(ethylene oxide) triblock copolymer ( $M_n=14600$  g/mol,  $\text{E}_{126}\text{P}_{61}\text{E}_{126}$ , the subscripts denote the number of repeating units), *para*-xylene,  $\text{Fe}(\text{NO}_3)_3$  and methanol were all purchased from Aldrich and used as received without further purification.

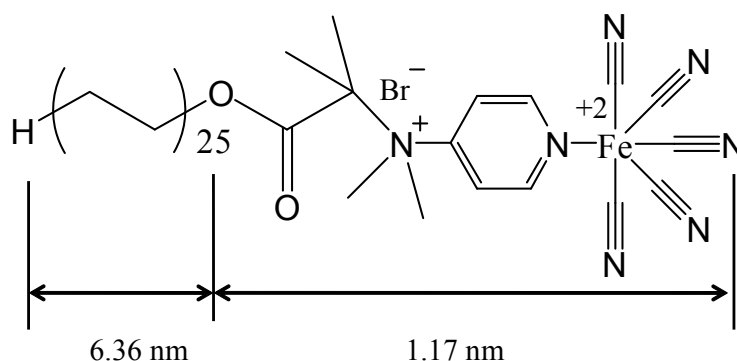

**Scheme S1** Chemical structure of PE-Fe. The length of fully extended PE chain was estimated to be  $0.2544 \text{ nm} \times 25 = 6.36 \text{ nm}$  by using ChemBioOffice 2010. Therefore, the length of fully extended PE-Fe was  $6.36 \text{ nm} + 1.17 \text{ nm} = 7.53 \text{ nm}$ .

### Effect of PPO fractions on the morphology of PE-PB particles

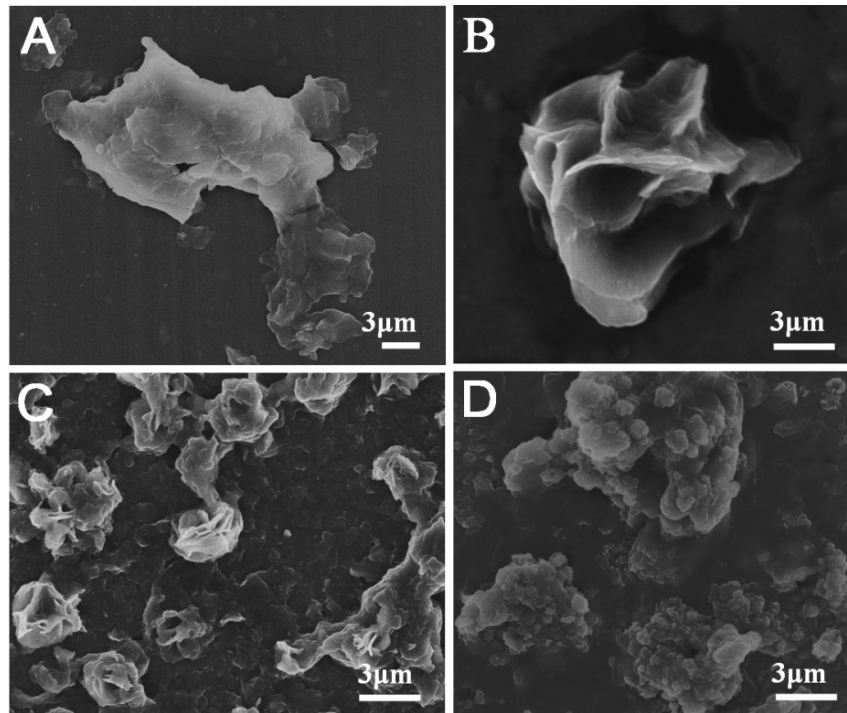

**Fig. S1** Scanning electron microscopy (SEM) images of PE-PB particles at various weight ratios of poly(propylene oxide) (PPO) to PE-Fe (A) 0:1, (B) 0.2:1, (C) 0.5:1, (D) 2:1.

### Isothermal crystallization kinetics of PE-Fe in xylene

The relative degree of crystallinity can be evaluated according to the equation:

$$X(t) = Q_t / Q_\infty = \int_0^t (dH / dt) dt / \int_0^\infty (dH / dt) dt \quad (\text{S1})$$

where  $Q_t$  and  $Q_\infty$  are the heat generated at time  $t$  and infinite time, respectively, and  $dH/dt$  is the heat flow rate. The plots of relative degree of crystallinity against crystallization time at 46 °C for PE-Fe and PE-Fe/PPO are shown in Fig. S2. It is obvious that crystallization of PE-Fe/PPO is slower than those of pristine PE-Fe. Crystallization halftime ( $t_{1/2}$ ) for PE-Fe/PPO was 0.45 min, double of that for PE-Fe (0.21 min), showing slower crystallization rate in contrast to PE-Fe. This indicated that crystallization of PE-Fe was hindered in the presence of PPO.

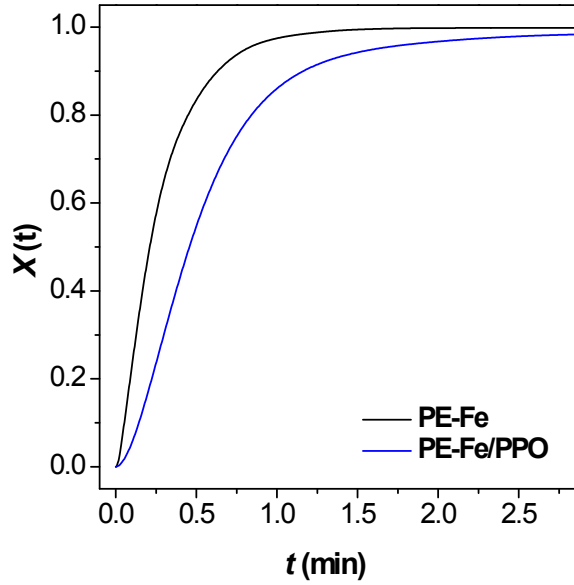

**Fig. S2** Plots of relative degree of crystallinity against crystallization time at 46 °C for PE-Fe and PE-Fe/PPO.

The isothermal crystallization kinetics can be analyzed in terms of Avrami theory:<sup>2, 3</sup>

$$1 - X(t) = \exp(-K t^n) \quad (\text{S2})$$

$$\ln[-\ln(1-X(t))] = \ln K + n \ln t \quad (\text{S3})$$

where  $K$  is the crystallization rate constant, and  $n$  is Avrami exponent whose value is dependent on the mechanism of nucleation and the form of crystal growth. The crystallization rate constant  $K$  and Avrami exponent  $n$  can be obtained from the intercept and slope from the lineal region of the plots of  $\ln[-\ln(1-X(t))]$  against  $\ln t$ , respectively, as shown in Fig. S3. The values of  $n$  and  $K$  are summarized in Table S1. The values of  $n$  for PE-Fe and PE-Fe/PPO were 1.30 and 1.58, respectively, illustrating quasi-two-dimensional crystallization with heterogeneous nucleation. Moreover, the crystallization rate constant,  $K$ , of PE-Fe/PPO was much lower than that of PE-Fe, indicating a slower crystallization rate. These are consistent with the results of crystallization halftime.

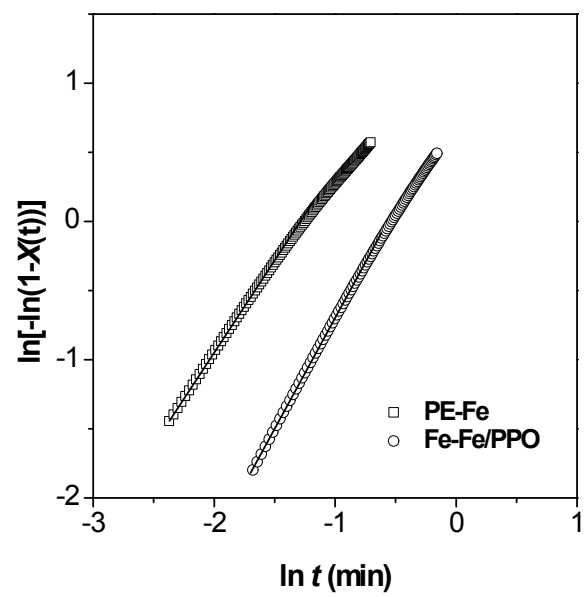

**Fig. S3** Plots of  $\ln[-\ln(1-X(t))]$  versus  $\ln t$  for PE-Fe and PE-Fe/PPO at 46 °C.

**Table S1** Isothermal crystallization parameters for PE-Fe and PE-Fe/PPO.

| sample    | $n$  | $K$  | $t_{1/2}$ (min) |
|-----------|------|------|-----------------|
| PE-Fe     | 1.30 | 5.27 | 0.21            |
| PE-Fe/PPO | 1.58 | 2.45 | 0.45            |

### Amperometric performance of PB particles and bare electrodes

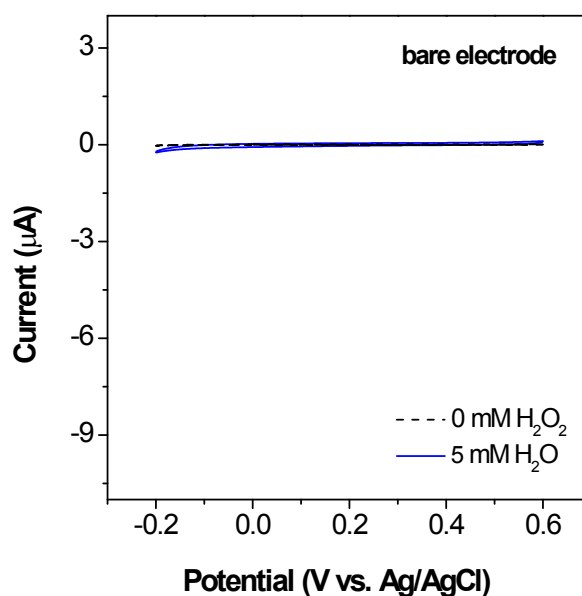

**Fig. S4** Cyclic voltammogram of bare glassy carbon electrode in 20 mM phosphate buffer solution in the absence (dashed curves) and the presence of 5 mM  $\text{H}_2\text{O}_2$  (solid curves). Scan rate:  $50 \text{ mV s}^{-1}$ , under  $\text{N}_2$ .

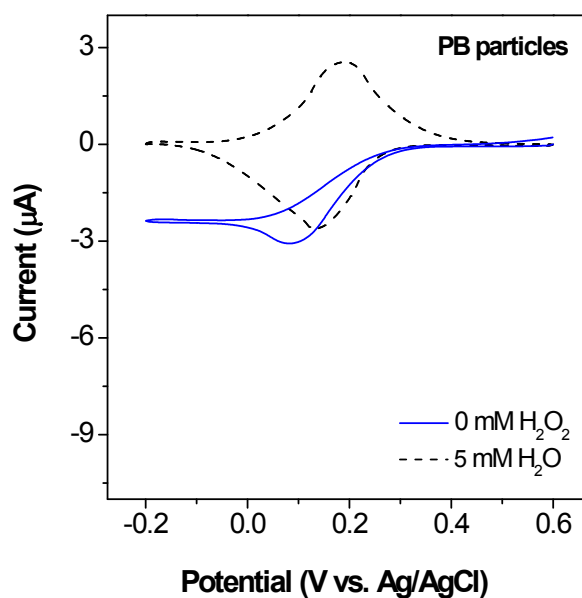

**Fig. S5** Cyclic voltammogram of conventional PB particles decorated electrode in 20 mM phosphate buffer solution in the absence (dashed curves) and the presence of 5 mM  $\text{H}_2\text{O}_2$  (solid curves). Scan rate:  $50 \text{ mV s}^{-1}$ , under  $\text{N}_2$ .

- 1 S. P. Bao, T. T. Liu, G. D. Liang, H. Y. Gao, F. M. Zhu and Q. Wu, *Chem. Eur. J.*, 2012, **18**, 15272–15276.
- 2 M. Avrami, *J. Chem. Phys.*, 1939, **7**, 1103-1112.
- 3 A. Jeziorny, *Polymer*, 1978, **19**, 1142-1144.
